# Supplementary material for: A catalog of numerical centrosome defects in epithelial ovarian cancers
Source: PubMed Central journal article supplement (PMC9449595; doi:10.15252/emmm.202215670), 2022-09-07
Supplement: EMMM-14-e15670-s001.pdf [file EMMM-14-e15670-s001.pdf]

# Table EV1

| <b>Samples from Institut Curie</b>                                |                    |
|-------------------------------------------------------------------|--------------------|
| <b>Ovarian healthy samples</b>                                    | <b>19 samples</b>  |
| <b>Ovarian tumor samples (1990-2012):</b>                         | <b>100 samples</b> |
| Primary tumors (samples after surgery and before chemotherapy)    | 100%               |
| <b>Age at diagnosis (years):</b>                                  |                    |
| Median                                                            | 60                 |
| Range                                                             | 31-87              |
| <b>Grades:</b>                                                    |                    |
| Low                                                               | 3 (3%)             |
| High                                                              | 97 (97%)           |
| <b>FIGO stages:</b>                                               |                    |
| I                                                                 | 10(10%)            |
| II                                                                | 8 (8%)             |
| III                                                               | 59(59%)            |
| IV                                                                | 12 (12%)           |
| NA                                                                | 11 (11%)           |
| <b>Histological types:</b>                                        |                    |
| Serous                                                            | 90 (90%)           |
| Endometrioid                                                      | 3 (3%)             |
| Mucinous                                                          | 4 (4%)             |
| Clear cells                                                       | 3 (3%)             |
| <b>Nb of tumors with genomic data (Affymetrix Cytoscan Array)</b> | <b>81 (81%)</b>    |

## **Clinical data of the patients included in this study and corresponding tumor characterization**

Clinical data, including FIGO staging, histology type, grade and age at diagnosis of the patients included in this study were prospectively registered.
